# Supplementary material
Source: MDPI journal article supplement (https://www.mdpi.com/2073-4344/10/8/840)
Supplement: s1 [file s1]

Article

# High complexity WO<sub>3</sub>-based catalyst with multi-catalytic species via 3D printing

Xiaofeng Wang <sup>1</sup>, Wei Guo <sup>2</sup>, Raed Abu-Reziq <sup>2</sup> and Shlomo Magdassi <sup>2,\*</sup>

<sup>1</sup> School of Materials Science and Engineering, Central South University, 410083 Changsha, China; wangxiaofeng@csu.edu.cn

<sup>2</sup> Institute of Chemistry and Casali Center of Applied Chemistry, The Hebrew University of Jerusalem, 91904 Jerusalem, Israel; [guowei198905@126.com](mailto:guowei198905@126.com) (W. G.); [Raed.Abu-Reziq@mail.huji.ac.il](mailto:Raed.Abu-Reziq@mail.huji.ac.il) (R.A.R.)

\* Correspondence: magdassi@mail.huji.ac.il; Tel.: T +972-2-6584967 (S.M.)

SUPPLEMENTARY MATERIAL

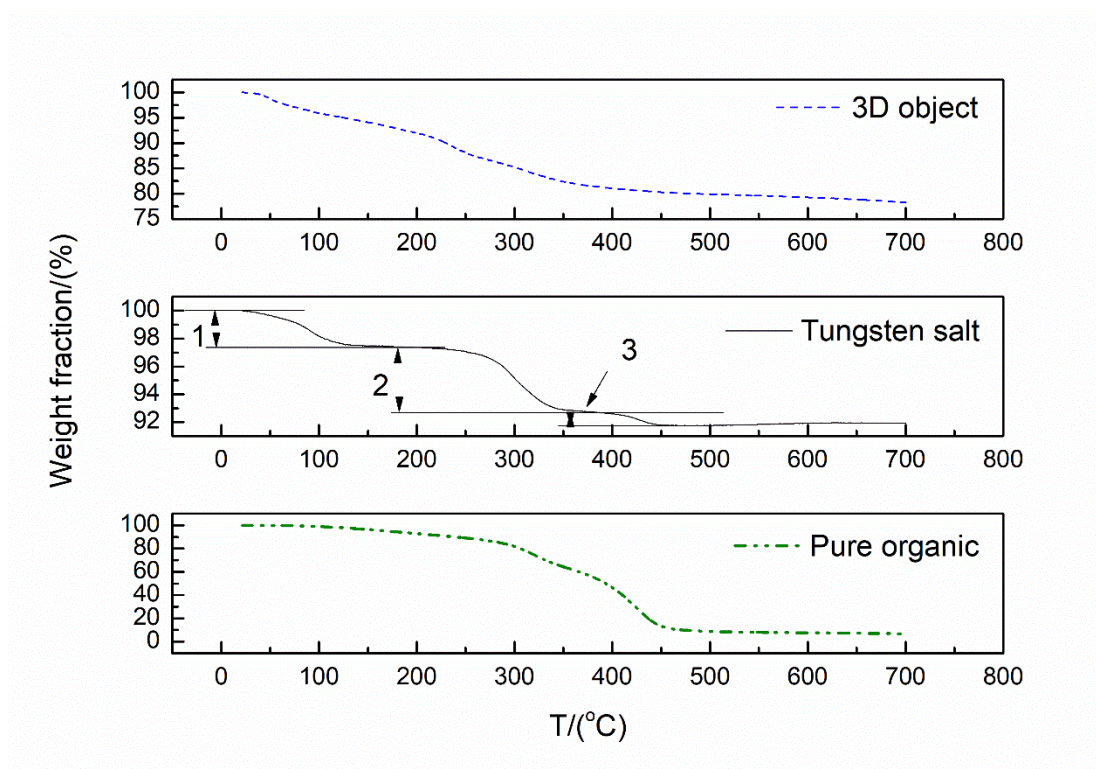

**Figure S1.** Thermogravimetric analysis of tungsten salt, ammonium metatungstate hydrate, dried 3D object, and pure organic without salt, which was fabricated in the same route as that for the 3D object.

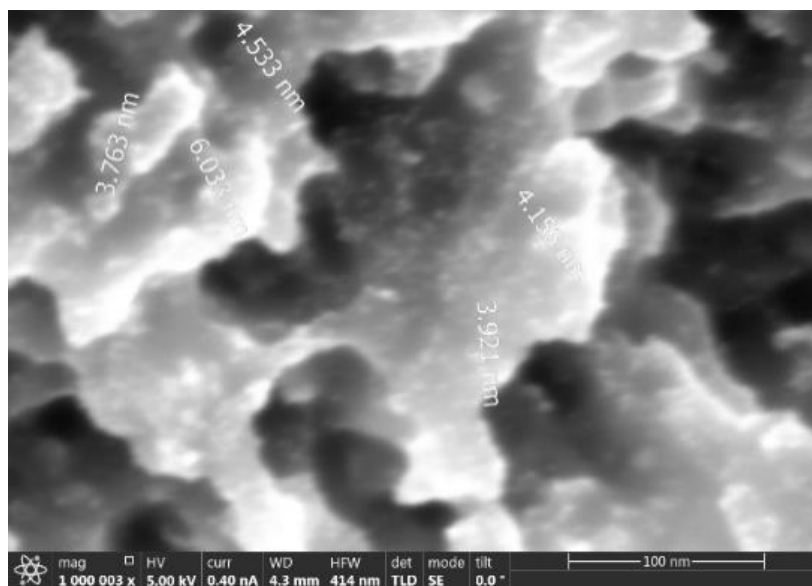

**Figure S2.** The particles of platinum oxide in the obtained catalyst, which is nano-sized.

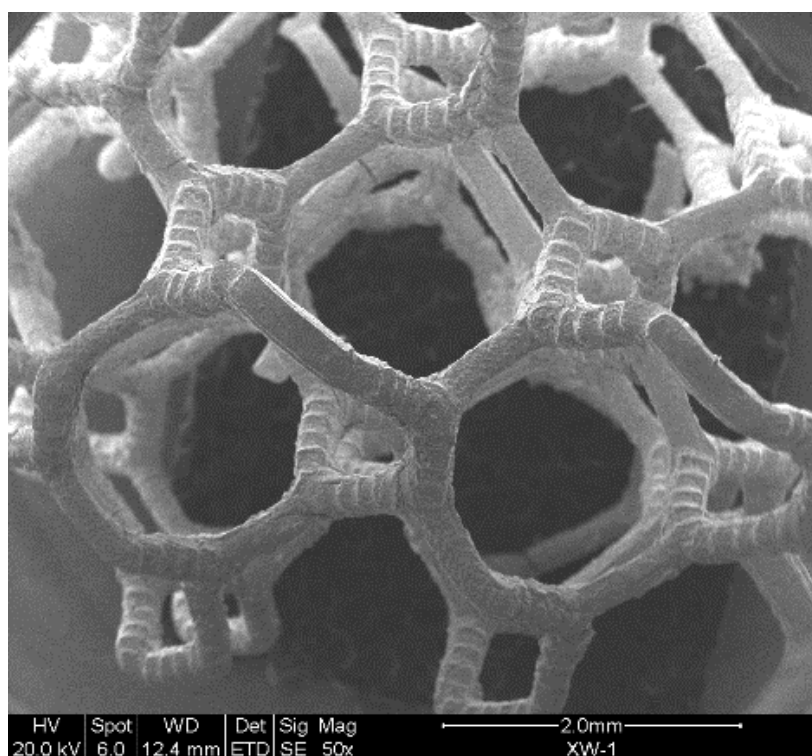

**Figure S3.** SEM images of pyrolyzed object.

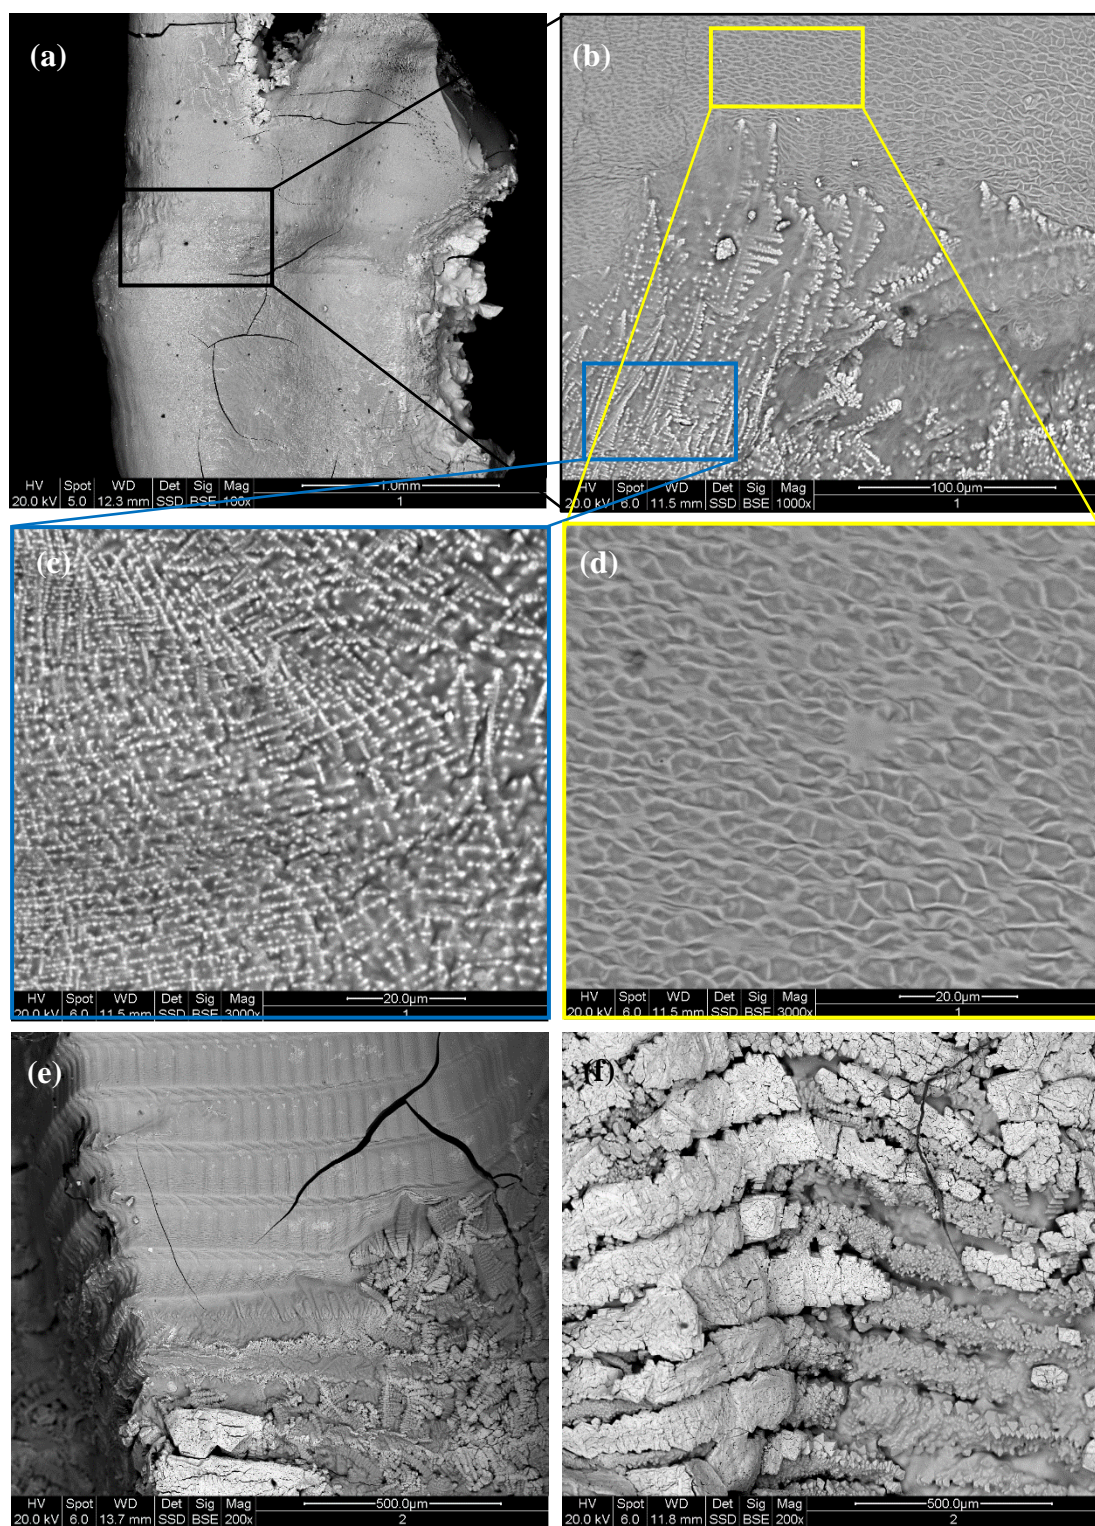

**Figure S4.** SEM images of the pyrolyzed tube. (a) and (b) interface between sections with Pd and Rh; (c) the section with Rh; (d) the section with Rh; (e) interface between sections with Pt and Rh; (f) the section with Pt, which is similar to that shown in Fig. 2.
